# Supplementary material for: Milk, Fruit and Vegetable, and Total Antioxidant Intakes in Relation to Mortality Rates: Cohort Studies in Women and Men
Source: Oxford University Press journal article supplement (doi:10.1093/aje/kww124), 2017-02-10
Supplement: kww124michaelssonwebtablesfinal.pdf [file kww124michaelssonwebtablesfinal.pdf]

**Web Table 1.** Hazard ratios and 95% confidence intervals of all-cause mortality by categories of milk intake and fruit and vegetable intake or ORAC (Model 2 is presented in Figure 2)

|                                                                                            | Glasses of Milk per Day |                  |                  |                  |
|--------------------------------------------------------------------------------------------|-------------------------|------------------|------------------|------------------|
|                                                                                            | <1                      | ≥1 to <2         | ≥2 to <3         | ≥3               |
| <i>Swedish Mammography Cohort (SMC; women), baseline 1987-1990 (time-updated analyses)</i> |                         |                  |                  |                  |
| Servings of fruit and vegetables/day                                                       |                         |                  |                  |                  |
| Model 1                                                                                    |                         |                  |                  |                  |
| <1                                                                                         | 2.59 (2.33-2.87)        | 2.83 (2.57-3.11) | 4.42 (3.99-4.90) | 4.42 (3.84-5.08) |
| ≥1 to <2                                                                                   | 1.83 (1.71-1.97)        | 2.42 (2.26-2.58) | 2.95 (2.72-3.19) | 3.26 (2.90-3.67) |
| ≥2 to <5                                                                                   | 1.35 (1.28-1.41)        | 1.69 (1.61-1.77) | 2.36 (2.23-2.49) | 2.84 (2.62-3.08) |
| ≥5                                                                                         | 1.00 (reference)        | 1.19 (1.13-1.26) | 1.57 (1.45-1.70) | 1.89 (1.66-2.16) |
| Model 2                                                                                    |                         |                  |                  |                  |
| <1                                                                                         | 1.82 (1.64-2.02)        | 1.94 (1.76-2.13) | 3.03 (2.73-3.37) | 2.79 (2.42-3.21) |
| ≥1 to <2                                                                                   | 1.43 (1.32-1.54)        | 1.78 (1.67-1.91) | 2.04 (1.88-2.22) | 2.27 (2.01-2.55) |
| ≥2 to <5                                                                                   | 1.18 (1.13-1.24)        | 1.39 (1.32-1.46) | 1.83 (1.72-1.94) | 2.14 (1.97-2.33) |
| ≥5                                                                                         | 1.00 (reference)        | 1.10 (1.04-1.17) | 1.35 (1.25-1.46) | 1.60 (1.40-1.82) |
| Model 3                                                                                    |                         |                  |                  |                  |
| <1                                                                                         | 1.81 (1.63-2.01)        | 1.92 (1.75-2.12) | 3.02 (2.72-3.35) | 2.77 (2.40-3.19) |
| ≥1 to <2                                                                                   | 1.42 (1.32-1.53)        | 1.78 (1.66-1.90) | 2.04 (1.88-2.21) | 2.26 (2.01-2.55) |
| ≥2 to <5                                                                                   | 1.18 (1.12-1.24)        | 1.38 (1.32-1.45) | 1.82 (1.72-1.93) | 2.14 (1.96-2.32) |
| ≥5                                                                                         | 1.00 (reference)        | 1.10 (1.04-1.17) | 1.36 (1.25-1.47) | 1.60 (1.41-1.83) |
| Model 4                                                                                    |                         |                  |                  |                  |
| <1                                                                                         | 1.65 (1.49-1.84)        | 2.05 (1.86-2.27) | 3.66 (3.27-4.09) | 4.23 (3.62-4.94) |
| ≥1 to <2                                                                                   | 1.33 (1.23-1.43)        | 1.90 (1.77-2.03) | 2.47 (2.26-2.70) | 3.29 (2.88-3.76) |
| ≥2 to <5                                                                                   | 1.14 (1.08-1.20)        | 1.51 (1.44-1.59) | 2.24 (2.09-2.39) | 3.14 (2.83-3.48) |
| ≥5                                                                                         | 1.00 (reference)        | 1.24 (1.17-1.31) | 1.68 (1.54-1.83) | 2.34 (2.03-2.71) |
| <i>Swedish Mammography Cohort (SMC; women), baseline 1997</i>                              |                         |                  |                  |                  |
| Servings of fruit and vegetables/day                                                       |                         |                  |                  |                  |
| Model 1                                                                                    |                         |                  |                  |                  |
| <1                                                                                         | 1.60 (1.39-1.84)        | 1.88 (1.53-2.31) | 3.11 (2.15-4.48) | 2.60 (1.47-4.58) |
| ≥1 to <2                                                                                   | 1.33 (1.21-1.45)        | 1.42 (1.25-1.62) | 1.31 (1.03-1.67) | 2.02 (1.40-2.91) |
| ≥2 to <5                                                                                   | 1.13 (1.07-1.18)        | 1.13 (1.06-1.21) | 1.31 (1.18-1.46) | 1.44 (1.19-1.74) |
| ≥5                                                                                         | 1.00 (reference)        | 1.08 (1.00-1.16) | 1.15 (1.02-1.30) | 1.13 (0.90-1.41) |
| Model 2                                                                                    |                         |                  |                  |                  |
| <1                                                                                         | 1.41 (1.22-1.63)        | 1.76 (1.42-2.17) | 2.73 (1.89-3.94) | 1.81 (1.03-3.20) |
| ≥1 to <2                                                                                   | 1.23 (1.12-1.35)        | 1.34 (1.17-1.53) | 1.12 (0.88-1.44) | 1.61 (1.11-2.32) |
| ≥2 to <5                                                                                   | 1.10 (1.04-1.16)        | 1.09 (1.01-1.17) | 1.28 (1.14-1.42) | 1.29 (1.07-1.56) |
| ≥5                                                                                         | 1.00 (reference)        | 1.03 (0.96-1.11) | 1.10 (0.97-1.24) | 1.10 (0.88-1.38) |
| Model 3                                                                                    |                         |                  |                  |                  |
| <1                                                                                         | 1.37 (1.18-1.57)        | 1.68 (1.36-2.07) | 2.55 (1.76-3.68) | 1.81 (1.03-3.20) |
| ≥1 to <2                                                                                   | 1.20 (1.10-1.31)        | 1.30 (1.14-1.49) | 1.11 (0.87-1.42) | 1.57 (1.09-2.27) |
| ≥2 to <5                                                                                   | 1.09 (1.04-1.15)        | 1.09 (1.02-1.17) | 1.27 (1.14-1.42) | 1.24 (1.03-1.50) |
| ≥5                                                                                         | 1.00 (reference)        | 1.04 (0.97-1.12) | 1.08 (0.96-1.22) | 1.12 (0.90-1.41) |
| Model 4                                                                                    |                         |                  |                  |                  |
| <1                                                                                         | 1.35 (1.17-1.56)        | 1.68 (1.35-2.09) | 2.50 (1.72-3.64) | 1.72 (0.95-3.13) |
| ≥1 to <2                                                                                   | 1.19 (1.08-1.31)        | 1.30 (1.14-1.50) | 1.10 (0.86-1.42) | 1.60 (1.09-2.33) |
| ≥2 to <5                                                                                   | 1.09 (1.03-1.15)        | 1.09 (1.01-1.17) | 1.27 (1.12-1.43) | 1.25 (1.01-1.56) |
| ≥5                                                                                         | 1.00 (reference)        | 1.04 (0.97-1.13) | 1.08 (0.95-1.23) | 1.12 (0.88-1.42) |
| <i>Cohort of Swedish Men (COSM), baseline 1997</i>                                         |                         |                  |                  |                  |
| Servings of fruit and vegetables/day                                                       |                         |                  |                  |                  |
| Model 1                                                                                    |                         |                  |                  |                  |
| <1                                                                                         | 1.64 (1.47-1.83)        | 1.52 (1.33-1.75) | 1.56 (1.34-1.81) | 1.62 (1.41-1.86) |
| ≥1 to <2                                                                                   | 1.30 (1.20-1.41)        | 1.26 (1.14-1.38) | 1.40 (1.27-1.55) | 1.35 (1.21-1.49) |

|                   |                  |                  |                  |                  |
|-------------------|------------------|------------------|------------------|------------------|
| $\geq 2$ to $< 5$ | 1.07 (1.01-1.14) | 1.11 (1.04-1.19) | 1.14 (1.06-1.22) | 1.24 (1.16-1.33) |
| $\geq 5$          | 1.00 (reference) | 1.05 (0.97-1.14) | 1.03 (0.94-1.13) | 1.12 (1.02-1.24) |
| Model 2           |                  |                  |                  |                  |
| $< 1$             | 1.35 (1.21-1.51) | 1.24 (1.08-1.43) | 1.32 (1.14-1.54) | 1.31 (1.14-1.51) |
| $\geq 1$ to $< 2$ | 1.16 (1.07-1.26) | 1.10 (1.00-1.21) | 1.25 (1.13-1.39) | 1.11 (0.99-1.23) |
| $\geq 2$ to $< 5$ | 1.02 (0.96-1.08) | 1.06 (0.99-1.13) | 1.06 (0.99-1.14) | 1.14 (1.06-1.23) |
| $\geq 5$          | 1.00 (reference) | 1.05 (0.97-1.13) | 1.01 (0.92-1.11) | 1.07 (0.97-1.18) |
| Model 3           |                  |                  |                  |                  |
| $< 1$             | 1.26 (1.12-1.41) | 1.16 (1.00-1.33) | 1.23 (1.06-1.43) | 1.26 (1.10-1.45) |
| $\geq 1$ to $< 2$ | 1.13 (1.04-1.22) | 1.06 (0.96-1.16) | 1.22 (1.10-1.35) | 1.10 (0.99-1.22) |
| $\geq 2$ to $< 5$ | 1.00 (0.94-1.06) | 1.04 (0.98-1.11) | 1.04 (0.97-1.12) | 1.15 (1.07-1.24) |
| $\geq 5$          | 1.00 (reference) | 1.04 (0.97-1.13) | 1.02 (0.93-1.12) | 1.09 (0.98-1.20) |
| Model 4           |                  |                  |                  |                  |
| $< 1$             | 1.26 (1.12-1.41) | 1.13 (0.98-1.31) | 1.18 (1.01-1.39) | 1.18 (1.01-1.38) |
| $\geq 1$ to $< 2$ | 1.14 (1.04-1.24) | 1.04 (0.94-1.15) | 1.18 (1.06-1.32) | 1.03 (0.91-1.17) |
| $\geq 2$ to $< 5$ | 1.01 (0.95-1.07) | 1.03 (0.96-1.10) | 1.02 (0.94-1.10) | 1.09 (0.99-1.19) |
| $\geq 5$          | 1.00 (reference) | 1.02 (0.94-1.11) | 0.99 (0.90-1.09) | 1.02 (0.91-1.14) |

*Swedish Mammography Cohort (SMC; women), baseline 1997*

|               |                  |                  |                  |                  |
|---------------|------------------|------------------|------------------|------------------|
| ORAC quartile |                  |                  |                  |                  |
| Model 1       |                  |                  |                  |                  |
| 1             | 1.27 (1.19-1.36) | 1.36 (1.24-1.50) | 1.62 (1.40-1.88) | 1.79 (1.42-2.26) |
| 2             | 1.09 (1.01-1.17) | 1.17 (1.06-1.29) | 1.33 (1.15-1.55) | 1.38 (1.02-1.88) |
| 3             | 1.07 (1.00-1.15) | 1.07 (0.97-1.18) | 1.13 (0.96-1.33) | 1.20 (0.91-1.59) |
| 4             | 1.00 (reference) | 1.10 (0.99-1.21) | 1.18 (1.01-1.37) | 1.31 (1.02-1.69) |
| Model 2       |                  |                  |                  |                  |
| 1             | 1.22 (1.13-1.33) | 1.30 (1.18-1.43) | 1.51 (1.30-1.76) | 1.62 (1.29-2.05) |
| 2             | 1.07 (0.99-1.15) | 1.10 (1.00-1.22) | 1.28 (1.10-1.49) | 1.28 (0.94-1.73) |
| 3             | 1.08 (1.00-1.16) | 1.04 (0.94-1.15) | 1.08 (0.91-1.27) | 1.02 (0.77-1.35) |
| 4             | 1.00 (reference) | 1.06 (0.96-1.17) | 1.11 (0.96-1.30) | 1.22 (0.95-1.58) |
| Model 3       |                  |                  |                  |                  |
| 1             | 1.20 (1.11-1.30) | 1.29 (1.17-1.42) | 1.53 (1.31-1.77) | 1.59 (1.26-2.01) |
| 2             | 1.06 (0.99-1.15) | 1.09 (0.99-1.21) | 1.27 (1.09-1.48) | 1.31 (0.97-1.78) |
| 3             | 1.07 (1.00-1.16) | 1.05 (0.94-1.16) | 1.03 (0.87-1.21) | 0.97 (0.73-1.28) |
| 4             | 1.00 (reference) | 1.08 (0.98-1.19) | 1.11 (0.96-1.30) | 1.23 (0.96-1.59) |
| Model 4       |                  |                  |                  |                  |
| 1             | 1.19 (1.09-1.29) | 1.27 (1.14-1.41) | 1.49 (1.27-1.75) | 1.56 (1.20-2.03) |
| 2             | 1.06 (0.98-1.14) | 1.08 (0.98-1.20) | 1.25 (1.07-1.46) | 1.29 (0.93-1.77) |
| 3             | 1.07 (0.99-1.16) | 1.04 (0.94-1.15) | 1.02 (0.86-1.21) | 0.97 (0.72-1.31) |
| 4             | 1.00 (reference) | 1.08 (0.98-1.20) | 1.11 (0.95-1.30) | 1.22 (0.94-1.60) |

*Cohort of Swedish Men (COSM), baseline 1997*

|               |                  |                  |                  |                  |
|---------------|------------------|------------------|------------------|------------------|
| ORAC quartile |                  |                  |                  |                  |
| Model 1       |                  |                  |                  |                  |
| 1             | 1.27 (1.19-1.37) | 1.32 (1.22-1.43) | 1.41 (1.29-1.54) | 1.54 (1.40-1.70) |
| 2             | 1.10 (1.02-1.19) | 1.07 (0.98-1.17) | 1.22 (1.11-1.34) | 1.27 (1.15-1.40) |
| 3             | 1.04 (0.96-1.13) | 1.12 (1.03-1.22) | 1.10 (1.00-1.21) | 1.18 (1.06-1.30) |
| 4             | 1.00 (reference) | 1.09 (1.00-1.19) | 1.03 (0.94-1.14) | 1.17 (1.06-1.29) |
| Model 2       |                  |                  |                  |                  |
| 1             | 1.20 (1.11-1.30) | 1.19 (1.09-1.30) | 1.28 (1.17-1.41) | 1.28 (1.16-1.42) |
| 2             | 1.07 (0.99-1.16) | 1.07 (0.98-1.16) | 1.15 (1.05-1.27) | 1.16 (1.05-1.28) |
| 3             | 1.06 (0.98-1.14) | 1.11 (1.02-1.22) | 1.08 (0.98-1.19) | 1.12 (1.01-1.24) |
| 4             | 1.00 (1.00-1.00) | 1.07 (0.98-1.17) | 1.00 (0.90-1.10) | 1.09 (0.99-1.21) |
| Model 3       |                  |                  |                  |                  |
| 1             | 1.16 (1.07-1.25) | 1.15 (1.05-1.25) | 1.24 (1.13-1.36) | 1.28 (1.16-1.41) |
| 2             | 1.05 (0.97-1.14) | 1.04 (0.95-1.13) | 1.15 (1.04-1.26) | 1.15 (1.04-1.27) |
| 3             | 1.05 (0.97-1.14) | 1.11 (1.01-1.21) | 1.06 (0.96-1.16) | 1.13 (1.03-1.25) |
| 4             | 1.00 (reference) | 1.07 (0.98-1.17) | 1.01 (0.91-1.11) | 1.11 (1.01-1.23) |

| Model 4 |                  |                  |                  |                  |
|---------|------------------|------------------|------------------|------------------|
| 1       | 1.16 (1.07-1.26) | 1.13 (1.03-1.24) | 1.20 (1.08-1.32) | 1.19 (1.06-1.34) |
| 2       | 1.06 (0.98-1.15) | 1.03 (0.94-1.12) | 1.11 (1.01-1.23) | 1.09 (0.97-1.22) |
| 3       | 1.06 (0.97-1.14) | 1.10 (1.00-1.20) | 1.03 (0.93-1.14) | 1.08 (0.96-1.21) |
| 4       | 1.00 (reference) | 1.05 (0.96-1.15) | 0.98 (0.89-1.09) | 1.06 (0.95-1.18) |

ORAC, oxygen radical absorbance capacity.

Covariates in model 1: age.

Covariates in model 2: age, body mass index, height, energy intake, alcohol intake, intake of yoghurt, cheese, red and processed meat, education, marital status (living alone vs. not), physical activity (metabolic equivalents), smoking habits (never/former/current smoker and for baseline 1997 also pack-years of smoking), ever use of antioxidant-containing supplements, and Charlson's weighted comorbidity index.

Covariates in model 3: as in model 2 and additionally use calcium-containing supplements and for baseline 1997 use of aspirin and prevalent hypercholesterolemia.

Covariates in model 4: as in model 3 and additionally energy adjusted dietary intake of protein, total and saturated fat, calcium, vitamin d, retinol, and phosphorous, ever use of cortisone, and ever use of estrogen replacement for women.

**Web Table 2.** Age-adjusted rates of cardiovascular mortality by categories of milk intake and fruit and vegetable intake or ORAC

|                                                                                            |         | Glasses of Milk per Day |                  |                  |                  |
|--------------------------------------------------------------------------------------------|---------|-------------------------|------------------|------------------|------------------|
|                                                                                            |         | <1                      | ≥1 to <2         | ≥2 to <3         | ≥3               |
| <i>Swedish Mammography Cohort (SMC; women), baseline 1987-1990 (time-updated analyses)</i> |         |                         |                  |                  |                  |
| Servings of fruit and vegetables/day                                                       |         |                         |                  |                  |                  |
| <1                                                                                         | rate    | 9.2 (7.9-10.7)          | 8.9 (7.7-10.3)   | 11.7 (9.9-13.8)  | 12.2 (9.5-15.5)  |
|                                                                                            | N cases | 175                     | 199              | 173              | 89               |
| ≥1 to <2                                                                                   | rate    | 7.0 (6.3-7.7)           | 8.0 (7.4-8.8)    | 8.6 (7.6-9.7)    | 8.5 (6.9-10.4)   |
|                                                                                            | N cases | 397                     | 519              | 327              | 113              |
| ≥2 to <5                                                                                   | rate    | 5.4 (5.1-5.6)           | 6.2 (5.9-6.5)    | 7.2 (6.7-7.7)    | 8.4 (7.4-9.5)    |
|                                                                                            | N cases | 1552                    | 1722             | 874              | 296              |
| ≥5                                                                                         | rate    | 4.2 (4.0-4.5)           | 4.8 (4.5-5.2)    | 6.3 (5.7-7.0)    | 6.8 (5.5-8.4)    |
|                                                                                            | N cases | 971                     | 798              | 330              | 90               |
| <i>Swedish Mammography Cohort (SMC; women), baseline 1997</i>                              |         |                         |                  |                  |                  |
| Servings of fruit and vegetables/day                                                       |         |                         |                  |                  |                  |
| <1                                                                                         | rate    | 10.4 (8.2-13.1)         | 15.2 (10.8-20.9) | 17.7 (9.1-31.0)  | 18.9 (6.5-43.2)  |
|                                                                                            | N cases | 92                      | 48               | 12               | 6                |
| ≥1 to <2                                                                                   | rate    | 8.2 (7.1-9.3)           | 10.6 (8.7-12.8)  | 10.1 (6.8-14.5)  | 12.2 (6.1-22.4)  |
|                                                                                            | N cases | 244                     | 117              | 31               | 13               |
| ≥2 to <5                                                                                   | rate    | 7.2 (6.8-7.6)           | 7.5 (6.8-8.2)    | 8.2 (6.9-9.7)    | 9.1 (6.6-12.3)   |
|                                                                                            | N cases | 1244                    | 452              | 143              | 43               |
| ≥5                                                                                         | rate    | 6.2 (5.8-6.6)           | 7.0 (6.3-7.7)    | 7.4 (6.1-9.0)    | 7.5 (5.1-10.6)   |
|                                                                                            | N cases | 1000                    | 364              | 111              | 32               |
| <i>Cohort of Swedish Men (COSM), baseline 1997</i>                                         |         |                         |                  |                  |                  |
| Servings of fruit and vegetables/day                                                       |         |                         |                  |                  |                  |
| <1                                                                                         | rate    | 13.7 (11.6-16.0)        | 16.1 (13.1-19.7) | 13.0 (10.1-16.4) | 14.3 (11.5-17.4) |
|                                                                                            | N cases | 159                     | 114              | 81               | 99               |
| ≥1 to <2                                                                                   | rate    | 10.9 (9.8-12.1)         | 11.4 (10.0-12.9) | 12.1 (10.5-13.8) | 12.2 (10.6-14.1) |
|                                                                                            | N cases | 369                     | 246              | 209              | 196              |
| ≥2 to <5                                                                                   | rate    | 8.7 (8.2-9.2)           | 9.5 (8.9-10.1)   | 9.6 (8.9-10.5)   | 11.2 (10.3-12.1) |
|                                                                                            | N cases | 1270                    | 870              | 580              | 573              |
| ≥5                                                                                         | rate    | 8.6 (8.0-9.2)           | 9.7 (8.8-10.6)   | 9.1 (8.0-10.3)   | 9.3 (8.1-10.7)   |
|                                                                                            | N cases | 714                     | 449              | 262              | 207              |
| <i>Swedish Mammography Cohort (SMC; women), baseline 1997</i>                              |         |                         |                  |                  |                  |
| ORAC quartile                                                                              |         |                         |                  |                  |                  |
| 1                                                                                          | rate    | 7.8 (7.3-8.3)           | 9.3 (8.3-10.5)   | 10.5 (8.3-13.0)  | 13.1 (9.0-18.3)  |
|                                                                                            | N cases | 899                     | 307              | 84               | 37               |
| 2                                                                                          | rate    | 6.8 (6.3-7.4)           | 7.3 (6.4-8.4)    | 7.5 (5.8-9.6)    | 7.0 (3.7-12.1)   |
|                                                                                            | N cases | 642                     | 227              | 70               | 13               |
| 3                                                                                          | rate    | 6.5 (6.0-7.0)           | 6.9 (6.0-7.9)    | 8.4 (6.5-10.6)   | 7.5 (4.5-11.7)   |
|                                                                                            | N cases | 587                     | 217              | 69               | 19               |
| 4                                                                                          | rate    | 6.0 (5.5-6.6)           | 7.2 (6.3-8.2)    | 6.9 (5.4-8.7)    | 7.8 (5.1-11.6)   |
|                                                                                            | N cases | 452                     | 230              | 74               | 25               |
| <i>Cohort of Swedish Men (COSM), baseline 1997</i>                                         |         |                         |                  |                  |                  |
| ORAC quartile                                                                              |         |                         |                  |                  |                  |
| 1                                                                                          | rate    | 10.8 (10.2-11.6)        | 11.9 (10.8-13.0) | 12.3 (11.0-13.6) | 13.5 (12.0-15.2) |
|                                                                                            | N cases | 932                     | 516              | 373              | 294              |
| 2                                                                                          | rate    | 8.9 (8.2-9.6)           | 9.0 (8.1-9.9)    | 9.9 (8.7-11.1)   | 10.9 (9.6-12.3)  |
|                                                                                            | N cases | 633                     | 390              | 288              | 261              |
| 3                                                                                          | rate    | 8.0 (7.3-8.7)           | 9.8 (8.9-10.8)   | 9.4 (8.3-10.7)   | 11.0 (9.7-12.4)  |
|                                                                                            | N cases |                         |                  |                  |                  |

|   |         |               |                |               |                |
|---|---------|---------------|----------------|---------------|----------------|
|   | N cases | 508           | 411            | 247           | 258            |
| 4 | rate    | 8.1 (7.3-8.9) | 9.3 (8.4-10.4) | 8.2 (7.2-9.4) | 9.7 (8.6-11.0) |
|   | N cases | 439           | 362            | 224           | 262            |

---

ORAC, oxygen radical absorbance capacity.

**Web Table 3.** Age-adjusted rates of cancer mortality by categories of milk intake and fruit and vegetable intake or ORAC

|                                                                                            |         | Glasses of Milk per Day |                |                 |                 |
|--------------------------------------------------------------------------------------------|---------|-------------------------|----------------|-----------------|-----------------|
|                                                                                            |         | <1                      | ≥1 to <2       | ≥2 to <3        | ≥3              |
| <i>Swedish Mammography Cohort (SMC; women), baseline 1987-1990 (time-updated analyses)</i> |         |                         |                |                 |                 |
| Servings of fruit and vegetables/day                                                       |         |                         |                |                 |                 |
| <1                                                                                         | rate    | 5.4 (4.4-6.7)           | 6.4 (5.4-7.6)  | 6.4 (5.1-7.9)   | 5.7 (4.1-7.8)   |
|                                                                                            | N cases | 95                      | 134            | 97              | 46              |
| ≥1 to <2                                                                                   | rate    | 4.5 (4.0-5.1)           | 5.0 (4.5-5.6)  | 4.8 (4.1-5.5)   | 5.1 (4.0-6.4)   |
|                                                                                            | N cases | 246                     | 318            | 191             | 81              |
| ≥2 to <5                                                                                   | rate    | 4.1 (3.9-4.4)           | 4.3 (4.1-4.6)  | 4.5 (4.1-4.8)   | 4.7 (4.0-5.4)   |
|                                                                                            | N cases | 1167                    | 1203           | 608             | 194             |
| ≥5                                                                                         | rate    | 4.0 (3.8-4.3)           | 4.0 (3.6-4.3)  | 4.0 (3.5-4.6)   | 5.2 (4.1-6.5)   |
|                                                                                            | N cases | 868                     | 594            | 217             | 79              |
| <i>Swedish Mammography Cohort (SMC; women), baseline 1997</i>                              |         |                         |                |                 |                 |
| Servings of fruit and vegetables/day                                                       |         |                         |                |                 |                 |
| <1                                                                                         | rate    | 5.8 (3.9-8.2)           | 5.7 (2.8-10.1) | 11.6 (5.0-22.9) | 13.8 (2.7-38.8) |
|                                                                                            | N cases | 36                      | 12             | 8               | 3               |
| ≥1 to <2                                                                                   | rate    | 5.7 (4.8-6.8)           | 4.6 (3.2-6.4)  | 4.8 (2.5-8.3)   | 6.2 (1.8-15.5)  |
|                                                                                            | N cases | 142                     | 39             | 13              | 5               |
| ≥2 to <5                                                                                   | rate    | 5.0 (4.7-5.3)           | 5.0 (4.4-5.7)  | 5.7 (4.6-7.0)   | 6.4 (4.2-9.1)   |
|                                                                                            | N cases | 890                     | 269            | 92              | 29              |
| ≥5                                                                                         | rate    | 4.4 (4.1-4.7)           | 4.3 (3.7-4.9)  | 4.6 (3.6-5.8)   | 5.1 (3.2-7.7)   |
|                                                                                            | N cases | 821                     | 219            | 67              | 22              |
| <i>Cohort of Swedish Men (COSM), baseline 1997</i>                                         |         |                         |                |                 |                 |
| Servings of fruit and vegetables/day                                                       |         |                         |                |                 |                 |
| <1                                                                                         | rate    | 9.2 (7.5-11.2)          | 7.7 (5.6-10.4) | 9.2 (6.5-12.5)  | 7.2 (5.3-9.6)   |
|                                                                                            | N cases | 102                     | 50             | 45              | 47              |
| ≥1 to <2                                                                                   | rate    | 6.8 (5.9-7.7)           | 6.2 (5.2-7.5)  | 7.1 (5.8-8.5)   | 7.0 (5.8-8.4)   |
|                                                                                            | N cases | 229                     | 123            | 115             | 114             |
| ≥2 to <5                                                                                   | rate    | 6.4 (6.0-6.8)           | 6.1 (5.6-6.7)  | 6.5 (5.9-7.2)   | 6.2 (5.5-6.9)   |
|                                                                                            | N cases | 973                     | 551            | 395             | 331             |
| ≥5                                                                                         | rate    | 5.7 (5.2-6.2)           | 5.6 (4.9-6.3)  | 6.0 (5.1-6.9)   | 6.2 (5.2-7.4)   |
|                                                                                            | N cases | 495                     | 257            | 174             | 138             |
| <i>Swedish Mammography Cohort (SMC; women), baseline 1997</i>                              |         |                         |                |                 |                 |
| ORAC quartile                                                                              |         |                         |                |                 |                 |
| 1                                                                                          | rate    | 5.2 (4.8-5.7)           | 4.8 (4.0-5.7)  | 7.1 (5.2-9.4)   | 5.7 (3.1-9.5)   |
|                                                                                            | N cases | 557                     | 131            | 48              | 15              |
| 2                                                                                          | rate    | 4.5 (4.1-5.0)           | 5.1 (4.2-6.0)  | 4.5 (3.2-6.1)   | 6.5 (3.4-11.1)  |
|                                                                                            | N cases | 455                     | 141            | 41              | 13              |
| 3                                                                                          | rate    | 4.8 (4.3-5.2)           | 4.4 (3.7-5.3)  | 5.8 (4.2-7.7)   | 5.4 (2.9-9.2)   |
|                                                                                            | N cases | 469                     | 132            | 46              | 13              |
| 4                                                                                          | rate    | 4.5 (4.1-5.0)           | 4.4 (3.7-5.2)  | 4.5 (3.3-6.0)   | 5.8 (3.4-9.2)   |
|                                                                                            | N cases | 408                     | 135            | 45              | 18              |
| <i>Cohort of Swedish Men (COSM), baseline 1997</i>                                         |         |                         |                |                 |                 |
| ORAC quartile                                                                              |         |                         |                |                 |                 |
| 1                                                                                          | rate    | 6.9 (6.3-7.4)           | 6.6 (5.8-7.5)  | 7.0 (6.1-8.2)   | 6.7 (5.7-7.9)   |
|                                                                                            | N cases | 571                     | 263            | 191             | 147             |
| 2                                                                                          | rate    | 6.5 (6.0-7.2)           | 6.0 (5.2-6.8)  | 6.9 (5.9-7.9)   | 7.1 (6.1-8.3)   |
|                                                                                            | N cases | 479                     | 244            | 194             | 172             |
| 3                                                                                          | rate    | 6.0 (5.5-6.7)           | 5.9 (5.2-6.7)  | 6.3 (5.4-7.3)   | 5.5 (4.6-6.6)   |
|                                                                                            | N cases | 405                     | 247            | 171             | 135             |
| 4                                                                                          | rate    | 5.7 (5.1-6.3)           | 5.7 (5.0-6.5)  | 6.1 (5.2-7.1)   | 6.2 (5.4-7.2)   |
|                                                                                            | N cases | 344                     | 227            | 173             | 176             |

ORAC, oxygen radical absorbance capacity.

**Web Table 4.** Hazard ratios and 95% confidence intervals of cardiovascular mortality by categories of milk intake and fruit and vegetable intake or ORAC

|                                                                                            | Glasses of Milk per Day |                  |                  |                  |
|--------------------------------------------------------------------------------------------|-------------------------|------------------|------------------|------------------|
|                                                                                            | <1                      | ≥1 to <2         | ≥2 to <3         | ≥3               |
| <i>Swedish Mammography Cohort (SMC; women), baseline 1987-1990 (time-updated analyses)</i> |                         |                  |                  |                  |
| Servings of fruit and vegetables/day                                                       |                         |                  |                  |                  |
| Model 1                                                                                    |                         |                  |                  |                  |
| <1                                                                                         | 2.92 (2.49-3.43)        | 3.03 (2.60-3.54) | 5.41 (4.60-6.37) | 5.68 (4.56-7.06) |
| ≥1 to <2                                                                                   | 2.05 (1.82-2.31)        | 2.74 (2.46-3.05) | 3.71 (3.27-4.21) | 3.62 (2.98-4.40) |
| ≥2 to <5                                                                                   | 1.44 (1.33-1.56)        | 1.87 (1.73-2.03) | 2.72 (2.48-2.98) | 3.57 (3.13-4.07) |
| ≥5                                                                                         | 1.00 (reference)        | 1.23 (1.12-1.36) | 1.87 (1.65-2.11) | 2.03 (1.63-2.51) |
| Model 2                                                                                    |                         |                  |                  |                  |
| <1                                                                                         | 1.95 (1.65-2.29)        | 1.90 (1.63-2.22) | 3.34 (2.83-3.94) | 3.07 (2.46-3.83) |
| ≥1 to <2                                                                                   | 1.53 (1.36-1.73)        | 1.89 (1.69-2.11) | 2.32 (2.04-2.64) | 2.26 (1.85-2.75) |
| ≥2 to <5                                                                                   | 1.24 (1.14-1.34)        | 1.46 (1.35-1.58) | 1.94 (1.76-2.13) | 2.44 (2.13-2.79) |
| ≥5                                                                                         | 1.00 (reference)        | 1.10 (1.01-1.21) | 1.52 (1.34-1.72) | 1.60 (1.29-1.99) |
| Model 3                                                                                    |                         |                  |                  |                  |
| <1                                                                                         | 1.94 (1.65-2.29)        | 1.89 (1.62-2.21) | 3.32 (2.82-3.92) | 3.05 (2.45-3.80) |
| ≥1 to <2                                                                                   | 1.52 (1.35-1.72)        | 1.88 (1.68-2.10) | 2.32 (2.04-2.64) | 2.25 (1.85-2.75) |
| ≥2 to <5                                                                                   | 1.23 (1.14-1.34)        | 1.46 (1.34-1.58) | 1.93 (1.76-2.13) | 2.43 (2.12-2.78) |
| ≥5                                                                                         | 1.00 (reference)        | 1.10 (1.00-1.21) | 1.53 (1.35-1.73) | 1.61 (1.29-2.00) |
| Model 4                                                                                    |                         |                  |                  |                  |
| <1                                                                                         | 1.76 (1.49-2.07)        | 2.10 (1.79-2.46) | 4.33 (3.63-5.16) | 5.41 (4.24-6.89) |
| ≥1 to <2                                                                                   | 1.42 (1.26-1.60)        | 2.07 (1.85-2.32) | 3.01 (2.62-3.46) | 3.70 (2.98-4.60) |
| ≥2 to <5                                                                                   | 1.19 (1.09-1.29)        | 1.65 (1.52-1.80) | 2.55 (2.29-2.85) | 4.07 (3.45-4.79) |
| ≥5                                                                                         | 1.00 (reference)        | 1.28 (1.16-1.42) | 2.01 (1.76-2.31) | 2.66 (2.10-3.37) |
| <i>Swedish Mammography Cohort (SMC; women), baseline 1997</i>                              |                         |                  |                  |                  |
| Servings of fruit and vegetables/day                                                       |                         |                  |                  |                  |
| Model 1                                                                                    |                         |                  |                  |                  |
| <1                                                                                         | 1.53 (1.23-1.90)        | 2.28 (1.70-3.05) | 3.64 (2.06-6.44) | 3.27 (1.47-7.30) |
| ≥1 to <2                                                                                   | 1.28 (1.11-1.47)        | 1.64 (1.35-1.98) | 1.52 (1.06-2.17) | 2.13 (1.23-3.68) |
| ≥2 to <5                                                                                   | 1.16 (1.06-1.26)        | 1.17 (1.05-1.31) | 1.32 (1.11-1.58) | 1.40 (1.03-1.91) |
| ≥5                                                                                         | 1.00 (reference)        | 1.13 (1.01-1.28) | 1.20 (0.99-1.46) | 1.27 (0.89-1.80) |
| Model 2                                                                                    |                         |                  |                  |                  |
| <1                                                                                         | 1.35 (1.08-1.68)        | 2.16 (1.61-2.90) | 3.08 (1.74-5.46) | 2.01 (0.90-4.49) |
| ≥1 to <2                                                                                   | 1.18 (1.02-1.37)        | 1.55 (1.27-1.88) | 1.28 (0.90-1.84) | 1.69 (0.98-2.93) |
| ≥2 to <5                                                                                   | 1.12 (1.03-1.23)        | 1.11 (0.99-1.24) | 1.29 (1.08-1.54) | 1.27 (0.94-1.73) |
| ≥5                                                                                         | 1.00 (reference)        | 1.06 (0.94-1.20) | 1.14 (0.94-1.39) | 1.22 (0.86-1.75) |
| Model 3                                                                                    |                         |                  |                  |                  |
| <1                                                                                         | 1.32 (1.06-1.65)        | 2.11 (1.57-2.83) | 2.91 (1.64-5.15) | 2.03 (0.91-4.54) |
| ≥1 to <2                                                                                   | 1.17 (1.01-1.35)        | 1.53 (1.26-1.86) | 1.28 (0.89-1.83) | 1.64 (0.95-2.85) |
| ≥2 to <5                                                                                   | 1.12 (1.03-1.22)        | 1.11 (0.99-1.24) | 1.29 (1.08-1.54) | 1.25 (0.92-1.70) |
| ≥5                                                                                         | 1.00 (reference)        | 1.07 (0.95-1.21) | 1.13 (0.92-1.37) | 1.25 (0.87-1.78) |
| Model 4                                                                                    |                         |                  |                  |                  |
| <1                                                                                         | 1.31 (1.04-1.64)        | 2.21 (1.63-3.00) | 3.01 (1.68-5.39) | 2.21 (0.93-5.26) |
| ≥1 to <2                                                                                   | 1.16 (0.99-1.35)        | 1.56 (1.28-1.91) | 1.30 (0.90-1.88) | 1.77 (1.00-3.12) |
| ≥2 to <5                                                                                   | 1.12 (1.02-1.22)        | 1.13 (1.00-1.27) | 1.33 (1.10-1.61) | 1.36 (0.96-1.93) |
| ≥5                                                                                         | 1.00 (reference)        | 1.09 (0.96-1.24) | 1.16 (0.94-1.44) | 1.31 (0.89-1.91) |
| <i>Cohort of Swedish Men (COSM), baseline 1997</i>                                         |                         |                  |                  |                  |
| Servings of fruit and vegetables/day                                                       |                         |                  |                  |                  |
| Model 1                                                                                    |                         |                  |                  |                  |
| <1                                                                                         | 1.59 (1.34-1.88)        | 1.69 (1.38-2.06) | 1.47 (1.17-1.85) | 1.61 (1.30-1.98) |
| ≥1 to <2                                                                                   | 1.28 (1.13-1.45)        | 1.25 (1.08-1.45) | 1.40 (1.20-1.63) | 1.46 (1.25-1.71) |

|          |                  |                  |                  |                  |
|----------|------------------|------------------|------------------|------------------|
| ≥2 to <5 | 1.02 (0.93-1.11) | 1.11 (1.00-1.22) | 1.10 (0.99-1.23) | 1.32 (1.18-1.48) |
| ≥5       | 1.00 (reference) | 1.10 (0.98-1.24) | 1.03 (0.90-1.19) | 1.08 (0.92-1.26) |
| Model 2  |                  |                  |                  |                  |
| <1       | 1.27 (1.07-1.52) | 1.27 (1.04-1.55) | 1.17 (0.93-1.48) | 1.26 (1.01-1.55) |
| ≥1 to <2 | 1.12 (0.98-1.27) | 1.05 (0.91-1.22) | 1.23 (1.05-1.43) | 1.16 (0.99-1.36) |
| ≥2 to <5 | 0.95 (0.86-1.04) | 1.02 (0.93-1.13) | 1.00 (0.89-1.11) | 1.19 (1.06-1.33) |
| ≥5       | 1.00 (reference) | 1.10 (0.98-1.24) | 1.01 (0.88-1.16) | 1.03 (0.88-1.20) |
| Model 3  |                  |                  |                  |                  |
| <1       | 1.19 (1.00-1.42) | 1.23 (1.00-1.50) | 1.12 (0.89-1.41) | 1.23 (0.99-1.52) |
| ≥1 to <2 | 1.10 (0.97-1.25) | 1.02 (0.88-1.18) | 1.21 (1.03-1.41) | 1.15 (0.98-1.35) |
| ≥2 to <5 | 0.93 (0.85-1.03) | 1.01 (0.92-1.12) | 0.98 (0.87-1.09) | 1.20 (1.07-1.34) |
| ≥5       | 1.00 (reference) | 1.10 (0.97-1.23) | 1.02 (0.89-1.18) | 1.04 (0.89-1.22) |
| Model 4  |                  |                  |                  |                  |
| <1       | 1.19 (1.00-1.43) | 1.20 (0.98-1.48) | 1.07 (0.84-1.36) | 1.14 (0.90-1.45) |
| ≥1 to <2 | 1.11 (0.97-1.27) | 1.01 (0.87-1.17) | 1.17 (0.99-1.38) | 1.07 (0.89-1.30) |
| ≥2 to <5 | 0.94 (0.86-1.04) | 1.00 (0.90-1.11) | 0.95 (0.84-1.07) | 1.12 (0.98-1.29) |
| ≥5       | 1.00 (reference) | 1.07 (0.95-1.21) | 0.99 (0.85-1.15) | 0.97 (0.81-1.16) |

*Swedish Mammography Cohort (SMC; women), baseline 1997*

|               |                  |                  |                  |                  |
|---------------|------------------|------------------|------------------|------------------|
| ORAC quartile |                  |                  |                  |                  |
| Model 1       |                  |                  |                  |                  |
| 1             | 1.31 (1.17-1.46) | 1.50 (1.30-1.74) | 1.77 (1.40-2.23) | 2.19 (1.57-3.06) |
| 2             | 1.14 (1.01-1.29) | 1.21 (1.03-1.41) | 1.29 (1.00-1.66) | 1.15 (0.67-2.00) |
| 3             | 1.10 (0.97-1.24) | 1.16 (0.99-1.36) | 1.32 (1.03-1.71) | 1.20 (0.76-1.90) |
| 4             | 1.00 (reference) | 1.21 (1.03-1.42) | 1.19 (0.93-1.53) | 1.43 (0.96-2.15) |
| Model 2       |                  |                  |                  |                  |
| 1             | 1.23 (1.08-1.40) | 1.40 (1.19-1.63) | 1.60 (1.26-2.02) | 1.93 (1.38-2.70) |
| 2             | 1.10 (0.97-1.25) | 1.09 (0.92-1.28) | 1.25 (0.97-1.60) | 1.05 (0.60-1.82) |
| 3             | 1.09 (0.96-1.24) | 1.10 (0.94-1.30) | 1.25 (0.97-1.62) | 1.02 (0.64-1.62) |
| 4             | 1.00 (reference) | 1.16 (0.99-1.36) | 1.11 (0.87-1.43) | 1.32 (0.88-1.98) |
| Model 3       |                  |                  |                  |                  |
| 1             | 1.21 (1.07-1.38) | 1.39 (1.19-1.62) | 1.60 (1.26-2.03) | 1.91 (1.36-2.67) |
| 2             | 1.10 (0.96-1.25) | 1.08 (0.91-1.27) | 1.24 (0.97-1.60) | 1.07 (0.62-1.87) |
| 3             | 1.09 (0.96-1.23) | 1.11 (0.94-1.31) | 1.21 (0.94-1.56) | 0.99 (0.62-1.56) |
| 4             | 1.00 (reference) | 1.17 (1.00-1.37) | 1.11 (0.87-1.43) | 1.33 (0.89-2.00) |
| Model 4       |                  |                  |                  |                  |
| 1             | 1.21 (1.05-1.39) | 1.41 (1.19-1.66) | 1.63 (1.27-2.10) | 2.05 (1.39-3.04) |
| 2             | 1.09 (0.96-1.25) | 1.09 (0.92-1.29) | 1.26 (0.97-1.64) | 1.12 (0.63-1.99) |
| 3             | 1.09 (0.96-1.24) | 1.13 (0.95-1.33) | 1.24 (0.96-1.61) | 1.05 (0.65-1.70) |
| 4             | 1.00 (reference) | 1.19 (1.01-1.40) | 1.15 (0.89-1.48) | 1.38 (0.90-2.11) |

*Cohort of Swedish Men (COSM), baseline 1997*

|               |                  |                  |                  |                  |
|---------------|------------------|------------------|------------------|------------------|
| ORAC quartile |                  |                  |                  |                  |
| Model 1       |                  |                  |                  |                  |
| 1             | 1.34 (1.20-1.51) | 1.41 (1.24-1.60) | 1.51 (1.32-1.74) | 1.72 (1.48-1.99) |
| 2             | 1.10 (0.97-1.24) | 1.10 (0.96-1.26) | 1.22 (1.05-1.41) | 1.34 (1.15-1.56) |
| 3             | 1.01 (0.89-1.15) | 1.22 (1.07-1.40) | 1.13 (0.97-1.33) | 1.36 (1.17-1.59) |
| 4             | 1.00 (reference) | 1.17 (1.02-1.34) | 1.01 (0.86-1.18) | 1.21 (1.04-1.41) |
| Model 2       |                  |                  |                  |                  |
| 1             | 1.21 (1.07-1.37) | 1.18 (1.03-1.35) | 1.28 (1.11-1.48) | 1.31 (1.13-1.53) |
| 2             | 1.02 (0.90-1.16) | 1.06 (0.92-1.22) | 1.11 (0.95-1.29) | 1.16 (0.99-1.35) |
| 3             | 1.02 (0.89-1.16) | 1.19 (1.04-1.37) | 1.09 (0.93-1.27) | 1.28 (1.10-1.49) |
| 4             | 1.00 (reference) | 1.11 (0.97-1.28) | 0.95 (0.81-1.12) | 1.12 (0.96-1.31) |
| Model 3       |                  |                  |                  |                  |
| 1             | 1.17 (1.03-1.33) | 1.15 (1.00-1.31) | 1.25 (1.08-1.45) | 1.31 (1.13-1.53) |
| 2             | 1.02 (0.90-1.15) | 1.03 (0.90-1.19) | 1.10 (0.95-1.28) | 1.15 (0.99-1.35) |
| 3             | 1.01 (0.89-1.16) | 1.19 (1.04-1.36) | 1.06 (0.91-1.25) | 1.30 (1.11-1.51) |
| 4             | 1.00 (reference) | 1.14 (0.99-1.31) | 0.96 (0.82-1.13) | 1.15 (0.98-1.34) |

| Model 4 |                  |                  |                  |                  |
|---------|------------------|------------------|------------------|------------------|
| 1       | 1.20 (1.06-1.37) | 1.14 (0.99-1.31) | 1.22 (1.04-1.42) | 1.22 (1.02-1.47) |
| 2       | 1.04 (0.91-1.18) | 1.03 (0.90-1.19) | 1.07 (0.91-1.25) | 1.09 (0.91-1.29) |
| 3       | 1.03 (0.90-1.17) | 1.18 (1.03-1.35) | 1.04 (0.88-1.22) | 1.22 (1.03-1.46) |
| 4       | 1.00 (reference) | 1.11 (0.97-1.28) | 0.93 (0.79-1.10) | 1.07 (0.90-1.27) |

ORAC, oxygen radical absorbance capacity.

Covariates in model 1: age.

Covariates in model 2: age, body mass index, height, energy intake, alcohol intake, intake of yoghurt, cheese, red and processed meat, education, marital status (living alone vs. not), physical activity (metabolic equivalents), smoking habits (never/former/current smoker and for baseline 1997 also pack-years of smoking), ever use of antioxidant-containing supplements, and Charlson's weighted comorbidity index.

Covariates in model 3: as in model 2 and additionally use calcium-containing supplements and for baseline 1997 use of aspirin and prevalent hypercholesterolemia.

Covariates in model 4: as in model 3 and additionally energy adjusted dietary intake of protein, total and saturated fat, calcium, vitamin d, retinol, and phosphorous, ever use of cortisone, and ever use of estrogen replacement for women.

**Web Table 5.** Hazard ratios and 95% confidence intervals of cancer mortality by categories of milk intake and fruit and vegetable intake or ORAC

|                                                                                            | Glasses of Milk per Day |                  |                  |                  |
|--------------------------------------------------------------------------------------------|-------------------------|------------------|------------------|------------------|
|                                                                                            | <1                      | ≥1 to <2         | ≥2 to <3         | ≥3               |
| <i>Swedish Mammography Cohort (SMC; women), baseline 1987-1990 (time-updated analyses)</i> |                         |                  |                  |                  |
| Servings of fruit and vegetables/day                                                       |                         |                  |                  |                  |
| Model 1                                                                                    |                         |                  |                  |                  |
| <1                                                                                         | 1.79 (1.45-2.21)        | 2.16 (1.80-2.59) | 2.47 (2.00-3.05) | 2.23 (1.65-3.00) |
| ≥1 to <2                                                                                   | 1.43 (1.24-1.65)        | 1.76 (1.55-2.00) | 1.81 (1.54-2.12) | 2.05 (1.63-2.57) |
| ≥2 to <5                                                                                   | 1.18 (1.08-1.29)        | 1.38 (1.26-1.50) | 1.65 (1.49-1.83) | 1.77 (1.52-2.07) |
| ≥5                                                                                         | 1.00 (reference)        | 1.05 (0.94-1.16) | 1.22 (1.05-1.41) | 1.67 (1.33-2.11) |
| Model 2                                                                                    |                         |                  |                  |                  |
| <1                                                                                         | 1.43 (1.15-1.77)        | 1.73 (1.43-2.08) | 2.00 (1.61-2.47) | 1.76 (1.31-2.38) |
| ≥1 to <2                                                                                   | 1.21 (1.05-1.40)        | 1.46 (1.28-1.67) | 1.48 (1.26-1.73) | 1.66 (1.32-2.09) |
| ≥2 to <5                                                                                   | 1.08 (0.99-1.18)        | 1.22 (1.11-1.33) | 1.43 (1.28-1.60) | 1.51 (1.29-1.78) |
| ≥5                                                                                         | 1.00 (reference)        | 1.00 (0.90-1.11) | 1.11 (0.95-1.29) | 1.51 (1.19-1.90) |
| Model 3                                                                                    |                         |                  |                  |                  |
| <1                                                                                         | 1.42 (1.14-1.76)        | 1.71 (1.42-2.06) | 1.98 (1.60-2.46) | 1.75 (1.29-2.36) |
| ≥1 to <2                                                                                   | 1.20 (1.04-1.39)        | 1.45 (1.27-1.66) | 1.47 (1.25-1.72) | 1.65 (1.31-2.08) |
| ≥2 to <5                                                                                   | 1.08 (0.98-1.18)        | 1.21 (1.11-1.33) | 1.43 (1.28-1.59) | 1.51 (1.28-1.77) |
| ≥5                                                                                         | 1.00 (reference)        | 1.00 (0.90-1.11) | 1.11 (0.96-1.29) | 1.51 (1.20-1.91) |
| Model 4                                                                                    |                         |                  |                  |                  |
| <1                                                                                         | 1.33 (1.07-1.66)        | 1.72 (1.42-2.08) | 2.11 (1.68-2.65) | 2.05 (1.47-2.84) |
| ≥1 to <2                                                                                   | 1.15 (0.99-1.33)        | 1.47 (1.28-1.68) | 1.57 (1.31-1.87) | 1.92 (1.47-2.49) |
| ≥2 to <5                                                                                   | 1.05 (0.96-1.15)        | 1.25 (1.13-1.37) | 1.54 (1.35-1.76) | 1.76 (1.44-2.16) |
| ≥5                                                                                         | 1.00 (reference)        | 1.05 (0.94-1.18) | 1.22 (1.03-1.44) | 1.79 (1.38-2.32) |
| <i>Swedish Mammography Cohort (SMC; women), baseline 1997</i>                              |                         |                  |                  |                  |
| Servings of fruit and vegetables/day                                                       |                         |                  |                  |                  |
| Model 1                                                                                    |                         |                  |                  |                  |
| <1                                                                                         | 1.22 (0.87-1.70)        | 1.07 (0.60-1.89) | 2.85 (1.42-5.73) | 2.56 (0.82-7.95) |
| ≥1 to <2                                                                                   | 1.28 (1.07-1.53)        | 1.02 (0.74-1.40) | 1.07 (0.62-1.85) | 1.48 (0.61-3.56) |
| ≥2 to <5                                                                                   | 1.13 (1.02-1.24)        | 1.11 (0.96-1.27) | 1.27 (1.02-1.57) | 1.45 (1.00-2.10) |
| ≥5                                                                                         | 1.00 (reference)        | 0.97 (0.83-1.12) | 1.04 (0.81-1.33) | 1.13 (0.74-1.73) |
| Model 2                                                                                    |                         |                  |                  |                  |
| <1                                                                                         | 1.05 (0.74-1.47)        | 0.93 (0.53-1.66) | 2.40 (1.19-4.82) | 2.03 (0.65-6.33) |
| ≥1 to <2                                                                                   | 1.15 (0.96-1.39)        | 0.92 (0.66-1.27) | 0.89 (0.51-1.53) | 1.23 (0.51-2.97) |
| ≥2 to <5                                                                                   | 1.08 (0.98-1.19)        | 1.04 (0.91-1.20) | 1.16 (0.94-1.45) | 1.25 (0.86-1.82) |
| ≥5                                                                                         | 1.00 (reference)        | 0.93 (0.80-1.08) | 0.97 (0.76-1.25) | 1.10 (0.72-1.68) |
| Model 3                                                                                    |                         |                  |                  |                  |
| <1                                                                                         | 0.99 (0.70-1.39)        | 0.87 (0.49-1.54) | 2.24 (1.11-4.50) | 1.94 (0.62-6.03) |
| ≥1 to <2                                                                                   | 1.11 (0.92-1.33)        | 0.88 (0.64-1.22) | 0.88 (0.51-1.52) | 1.19 (0.49-2.87) |
| ≥2 to <5                                                                                   | 1.07 (0.97-1.18)        | 1.05 (0.91-1.21) | 1.16 (0.94-1.45) | 1.20 (0.83-1.75) |
| ≥5                                                                                         | 1.00 (reference)        | 0.94 (0.81-1.10) | 0.96 (0.74-1.23) | 1.11 (0.72-1.70) |
| Model 4                                                                                    |                         |                  |                  |                  |
| <1                                                                                         | 0.99 (0.70-1.40)        | 0.83 (0.47-1.50) | 2.10 (1.03-4.30) | 1.70 (0.53-5.49) |
| ≥1 to <2                                                                                   | 1.11 (0.91-1.34)        | 0.86 (0.62-1.20) | 0.84 (0.48-1.47) | 1.10 (0.45-2.72) |
| ≥2 to <5                                                                                   | 1.07 (0.97-1.19)        | 1.03 (0.88-1.19) | 1.12 (0.88-1.42) | 1.10 (0.72-1.69) |
| ≥5                                                                                         | 1.00 (reference)        | 0.92 (0.78-1.08) | 0.91 (0.70-1.19) | 1.03 (0.65-1.63) |
| <i>Cohort of Swedish Men (COSM), baseline 1997</i>                                         |                         |                  |                  |                  |
| Servings of fruit and vegetables/day                                                       |                         |                  |                  |                  |
| Model 1                                                                                    |                         |                  |                  |                  |
| <1                                                                                         | 1.60 (1.29-1.98)        | 1.30 (0.97-1.74) | 1.41 (1.04-1.91) | 1.23 (0.91-1.66) |
| ≥1 to <2                                                                                   | 1.20 (1.03-1.40)        | 1.02 (0.84-1.25) | 1.22 (0.99-1.49) | 1.25 (1.02-1.53) |

|          |                  |                  |                  |                  |
|----------|------------------|------------------|------------------|------------------|
| ≥2 to <5 | 1.12 (1.01-1.25) | 1.07 (0.95-1.21) | 1.14 (1.00-1.30) | 1.11 (0.96-1.27) |
| ≥5       | 1.00 (reference) | 0.95 (0.82-1.11) | 1.03 (0.86-1.22) | 1.08 (0.90-1.31) |
| Model 2  |                  |                  |                  |                  |
| <1       | 1.34 (1.08-1.67) | 1.11 (0.83-1.50) | 1.22 (0.90-1.67) | 1.01 (0.75-1.37) |
| ≥1 to <2 | 1.07 (0.91-1.26) | 0.91 (0.75-1.12) | 1.08 (0.88-1.32) | 1.07 (0.87-1.31) |
| ≥2 to <5 | 1.07 (0.96-1.20) | 1.03 (0.91-1.16) | 1.08 (0.94-1.23) | 1.02 (0.88-1.17) |
| ≥5       | 1.00 (reference) | 0.95 (0.82-1.11) | 1.01 (0.85-1.21) | 1.04 (0.86-1.26) |
| Model 3  |                  |                  |                  |                  |
| <1       | 1.24 (1.00-1.55) | 1.02 (0.76-1.37) | 1.11 (0.81-1.51) | 0.97 (0.72-1.31) |
| ≥1 to <2 | 1.03 (0.88-1.21) | 0.87 (0.71-1.07) | 1.04 (0.84-1.27) | 1.07 (0.87-1.31) |
| ≥2 to <5 | 1.05 (0.94-1.18) | 1.01 (0.89-1.14) | 1.06 (0.93-1.21) | 1.03 (0.89-1.19) |
| ≥5       | 1.00 (reference) | 0.95 (0.81-1.10) | 1.02 (0.86-1.21) | 1.06 (0.88-1.29) |
| Model 4  |                  |                  |                  |                  |
| <1       | 1.24 (0.99-1.55) | 1.03 (0.76-1.39) | 1.13 (0.82-1.55) | 1.00 (0.72-1.40) |
| ≥1 to <2 | 1.03 (0.87-1.21) | 0.88 (0.72-1.08) | 1.06 (0.85-1.31) | 1.10 (0.86-1.40) |
| ≥2 to <5 | 1.06 (0.94-1.18) | 1.02 (0.90-1.16) | 1.08 (0.93-1.25) | 1.05 (0.88-1.26) |
| ≥5       | 1.00 (reference) | 0.95 (0.82-1.11) | 1.03 (0.86-1.24) | 1.08 (0.87-1.35) |

*Swedish Mammography Cohort (SMC; women), baseline 1997*

|               |                  |                  |                  |                  |
|---------------|------------------|------------------|------------------|------------------|
| ORAC quartile |                  |                  |                  |                  |
| Model 1       |                  |                  |                  |                  |
| 1             | 1.16 (1.02-1.32) | 1.04 (0.85-1.27) | 1.46 (1.09-1.98) | 1.40 (0.83-2.34) |
| 2             | 1.00 (0.88-1.15) | 1.09 (0.90-1.32) | 1.04 (0.75-1.43) | 1.46 (0.84-2.54) |
| 3             | 1.06 (0.92-1.20) | 0.99 (0.81-1.20) | 1.24 (0.91-1.68) | 1.14 (0.66-1.98) |
| 4             | 1.00 (reference) | 0.96 (0.79-1.17) | 0.99 (0.73-1.35) | 1.30 (0.81-2.08) |
| Model 2       |                  |                  |                  |                  |
| 1             | 1.09 (0.94-1.27) | 0.96 (0.78-1.18) | 1.31 (0.97-1.78) | 1.25 (0.74-2.09) |
| 2             | 0.97 (0.84-1.12) | 1.03 (0.84-1.25) | 0.94 (0.68-1.30) | 1.33 (0.76-2.31) |
| 3             | 1.05 (0.92-1.21) | 0.95 (0.78-1.15) | 1.13 (0.83-1.53) | 0.99 (0.57-1.73) |
| 4             | 1.00 (reference) | 0.94 (0.77-1.14) | 0.94 (0.69-1.28) | 1.24 (0.77-1.99) |
| Model 3       |                  |                  |                  |                  |
| 1             | 1.07 (0.92-1.24) | 0.95 (0.77-1.17) | 1.36 (1.00-1.84) | 1.20 (0.72-2.01) |
| 2             | 0.97 (0.84-1.12) | 1.03 (0.84-1.25) | 0.93 (0.68-1.29) | 1.35 (0.78-2.35) |
| 3             | 1.05 (0.91-1.20) | 0.95 (0.78-1.16) | 1.07 (0.79-1.46) | 0.93 (0.53-1.62) |
| 4             | 1.00 (reference) | 0.96 (0.79-1.16) | 0.94 (0.69-1.28) | 1.26 (0.78-2.02) |
| Model 4       |                  |                  |                  |                  |
| 1             | 1.05 (0.89-1.23) | 0.91 (0.73-1.13) | 1.28 (0.93-1.78) | 1.09 (0.62-1.92) |
| 2             | 0.96 (0.83-1.12) | 1.00 (0.81-1.22) | 0.89 (0.64-1.25) | 1.24 (0.69-2.23) |
| 3             | 1.04 (0.91-1.20) | 0.93 (0.76-1.14) | 1.03 (0.75-1.42) | 0.87 (0.48-1.55) |
| 4             | 1.00 (reference) | 0.94 (0.77-1.15) | 0.91 (0.66-1.25) | 1.18 (0.71-1.96) |

*Cohort of Swedish Men (COSM), baseline 1997*

|               |                  |                  |                  |                  |
|---------------|------------------|------------------|------------------|------------------|
| ORAC quartile |                  |                  |                  |                  |
| Model 1       |                  |                  |                  |                  |
| 1             | 1.20 (1.05-1.37) | 1.11 (0.95-1.30) | 1.20 (1.00-1.43) | 1.21 (1.00-1.47) |
| 2             | 1.14 (0.99-1.31) | 1.01 (0.86-1.19) | 1.20 (1.00-1.43) | 1.24 (1.03-1.49) |
| 3             | 1.06 (0.92-1.22) | 1.03 (0.88-1.22) | 1.08 (0.90-1.30) | 0.97 (0.80-1.19) |
| 4             | 1.00 (reference) | 0.99 (0.84-1.17) | 1.05 (0.87-1.26) | 1.10 (0.92-1.32) |
| Model 2       |                  |                  |                  |                  |
| 1             | 1.17 (1.01-1.35) | 1.06 (0.89-1.26) | 1.13 (0.94-1.35) | 1.09 (0.89-1.33) |
| 2             | 1.13 (0.98-1.30) | 1.01 (0.85-1.20) | 1.16 (0.97-1.39) | 1.16 (0.96-1.39) |
| 3             | 1.07 (0.93-1.24) | 1.05 (0.89-1.24) | 1.08 (0.90-1.29) | 0.93 (0.76-1.13) |
| 4             | 1.00 (reference) | 0.99 (0.84-1.17) | 1.03 (0.86-1.24) | 1.04 (0.87-1.25) |
| Model 3       |                  |                  |                  |                  |
| 1             | 1.12 (0.96-1.30) | 1.01 (0.85-1.20) | 1.08 (0.90-1.30) | 1.08 (0.88-1.31) |
| 2             | 1.10 (0.95-1.27) | 0.98 (0.83-1.16) | 1.15 (0.96-1.38) | 1.16 (0.96-1.39) |
| 3             | 1.06 (0.92-1.23) | 1.03 (0.87-1.22) | 1.04 (0.87-1.25) | 0.94 (0.77-1.15) |
| 4             | 1.00 (reference) | 0.99 (0.84-1.18) | 1.04 (0.86-1.25) | 1.06 (0.88-1.28) |

| Model 4 |                  |                  |                  |                  |
|---------|------------------|------------------|------------------|------------------|
| 1       | 1.11 (0.95-1.30) | 1.02 (0.85-1.21) | 1.09 (0.89-1.34) | 1.10 (0.87-1.40) |
| 2       | 1.10 (0.95-1.27) | 0.99 (0.83-1.17) | 1.17 (0.97-1.41) | 1.19 (0.95-1.47) |
| 3       | 1.06 (0.92-1.23) | 1.04 (0.88-1.22) | 1.06 (0.87-1.28) | 0.96 (0.77-1.21) |
| 4       | 1.00 (reference) | 1.00 (0.84-1.18) | 1.05 (0.87-1.27) | 1.08 (0.87-1.34) |

ORAC, oxygen radical absorbance capacity.

Covariates in model 1: age.

Covariates in model 2: age, body mass index, height, energy intake, alcohol intake, intake of yoghurt, cheese, red and processed meat, education, marital status (living alone vs. not), physical activity (metabolic equivalents), smoking habits (never/former/current smoker and for baseline 1997 also pack-years of smoking), ever use of antioxidant-containing supplements, and Charlson's weighted comorbidity index.

Covariates in model 3: as in model 2 and additionally use calcium-containing supplements and for baseline 1997 use of aspirin and prevalent hypercholesterolemia.

Covariates in model 4: as in model 3 and additionally energy adjusted dietary intake of protein, total and saturated fat, calcium, vitamin d, retinol, and phosphorous, ever use of cortisone, and ever use of estrogen replacement for women.

**Web Table 6.** Hazard ratios and 95% confidence intervals of all-cause mortality by categories of milk intake and fruit and vegetable intake or ORAC, first 2 years of follow-up excluded

|                                                                                            | Glasses of Milk per Day |                  |                  |                  |
|--------------------------------------------------------------------------------------------|-------------------------|------------------|------------------|------------------|
|                                                                                            | <1                      | ≥1 to <2         | ≥2 to <3         | ≥3               |
| <i>Swedish Mammography Cohort (SMC; women), baseline 1987-1990 (time-updated analyses)</i> |                         |                  |                  |                  |
| Servings of fruit and vegetables/day                                                       |                         |                  |                  |                  |
| Model 1                                                                                    |                         |                  |                  |                  |
| <1                                                                                         | 2.60 (2.35-2.89)        | 2.82 (2.56-3.10) | 4.51 (4.07-5.01) | 4.41 (3.82-5.09) |
| ≥1 to <2                                                                                   | 1.82 (1.69-1.96)        | 2.44 (2.28-2.61) | 2.95 (2.72-3.20) | 3.32 (2.95-3.74) |
| ≥2 to <5                                                                                   | 1.35 (1.28-1.41)        | 1.69 (1.61-1.77) | 2.36 (2.23-2.50) | 2.86 (2.64-3.11) |
| ≥5                                                                                         | 1.00 (reference)        | 1.19 (1.12-1.26) | 1.57 (1.45-1.70) | 1.89 (1.66-2.15) |
| Model 2                                                                                    |                         |                  |                  |                  |
| <1                                                                                         | 1.83 (1.64-2.03)        | 1.92 (1.74-2.12) | 3.08 (2.77-3.42) | 2.76 (2.39-3.19) |
| ≥1 to <2                                                                                   | 1.41 (1.31-1.52)        | 1.79 (1.68-1.92) | 2.03 (1.87-2.21) | 2.29 (2.03-2.58) |
| ≥2 to <5                                                                                   | 1.19 (1.13-1.24)        | 1.39 (1.32-1.45) | 1.82 (1.72-1.93) | 2.15 (1.97-2.34) |
| ≥5                                                                                         | 1.00 (reference)        | 1.10 (1.04-1.16) | 1.35 (1.25-1.46) | 1.60 (1.40-1.82) |
| Model 3                                                                                    |                         |                  |                  |                  |
| <1                                                                                         | 1.82 (1.64-2.02)        | 1.91 (1.73-2.10) | 3.07 (2.76-3.41) | 2.75 (2.38-3.17) |
| ≥1 to <2                                                                                   | 1.40 (1.30-1.51)        | 1.79 (1.67-1.91) | 2.03 (1.87-2.21) | 2.28 (2.02-2.58) |
| ≥2 to <5                                                                                   | 1.18 (1.12-1.24)        | 1.38 (1.31-1.45) | 1.82 (1.72-1.93) | 2.14 (1.97-2.34) |
| ≥5                                                                                         | 1.00 (reference)        | 1.10 (1.04-1.16) | 1.36 (1.25-1.47) | 1.60 (1.40-1.83) |
| Model 4                                                                                    |                         |                  |                  |                  |
| <1                                                                                         | 1.66 (1.49-1.84)        | 2.04 (1.85-2.25) | 3.73 (3.33-4.17) | 4.23 (3.61-4.96) |
| ≥1 to <2                                                                                   | 1.31 (1.22-1.42)        | 1.91 (1.78-2.05) | 2.47 (2.25-2.70) | 3.36 (2.94-3.84) |
| ≥2 to <5                                                                                   | 1.14 (1.08-1.20)        | 1.51 (1.44-1.59) | 2.25 (2.10-2.40) | 3.19 (2.87-3.54) |
| ≥5                                                                                         | 1.00 (reference)        | 1.24 (1.16-1.31) | 1.69 (1.55-1.84) | 2.37 (2.05-2.74) |
| <i>Swedish Mammography Cohort (SMC; women), baseline 1997</i>                              |                         |                  |                  |                  |
| ORAC quartile                                                                              |                         |                  |                  |                  |
| Model 1                                                                                    |                         |                  |                  |                  |
| 1                                                                                          | 1.26 (1.17-1.35)        | 1.32 (1.20-1.45) | 1.58 (1.36-1.84) | 1.66 (1.30-2.12) |
| 2                                                                                          | 1.08 (1.00-1.16)        | 1.15 (1.04-1.27) | 1.30 (1.12-1.52) | 1.37 (1.00-1.87) |
| 3                                                                                          | 1.07 (1.00-1.16)        | 1.08 (0.97-1.19) | 1.11 (0.94-1.31) | 1.20 (0.90-1.59) |
| 4                                                                                          | 1.00 (reference)        | 1.09 (0.98-1.20) | 1.17 (1.00-1.36) | 1.29 (0.99-1.67) |
| Model 2                                                                                    |                         |                  |                  |                  |
| 1                                                                                          | 1.21 (1.12-1.31)        | 1.25 (1.13-1.39) | 1.47 (1.26-1.72) | 1.52 (1.19-1.94) |
| 2                                                                                          | 1.06 (0.98-1.14)        | 1.08 (0.98-1.20) | 1.25 (1.07-1.46) | 1.28 (0.94-1.75) |
| 3                                                                                          | 1.08 (1.00-1.16)        | 1.04 (0.94-1.16) | 1.06 (0.89-1.25) | 1.02 (0.77-1.36) |
| 4                                                                                          | 1.00 (reference)        | 1.06 (0.95-1.17) | 1.11 (0.95-1.29) | 1.21 (0.93-1.57) |
| Model 3                                                                                    |                         |                  |                  |                  |
| 1                                                                                          | 1.19 (1.10-1.29)        | 1.24 (1.12-1.38) | 1.49 (1.27-1.74) | 1.49 (1.17-1.91) |
| 2                                                                                          | 1.06 (0.98-1.14)        | 1.08 (0.97-1.19) | 1.24 (1.06-1.45) | 1.30 (0.95-1.78) |
| 3                                                                                          | 1.07 (0.99-1.16)        | 1.05 (0.95-1.16) | 1.01 (0.86-1.20) | 0.97 (0.73-1.29) |
| 4                                                                                          | 1.00 (reference)        | 1.07 (0.97-1.18) | 1.11 (0.95-1.29) | 1.22 (0.94-1.58) |
| Model 4                                                                                    |                         |                  |                  |                  |
| 1                                                                                          | 1.18 (1.08-1.28)        | 1.23 (1.10-1.37) | 1.46 (1.24-1.72) | 1.47 (1.12-1.94) |
| 2                                                                                          | 1.05 (0.97-1.14)        | 1.07 (0.96-1.19) | 1.22 (1.04-1.44) | 1.28 (0.93-1.78) |
| 3                                                                                          | 1.07 (0.99-1.16)        | 1.04 (0.94-1.16) | 1.00 (0.84-1.19) | 0.98 (0.72-1.32) |
| 4                                                                                          | 1.00 (reference)        | 1.07 (0.97-1.19) | 1.11 (0.94-1.30) | 1.21 (0.92-1.60) |
| <i>Cohort of Swedish Men (COSM), baseline 1997</i>                                         |                         |                  |                  |                  |
| ORAC quartile                                                                              |                         |                  |                  |                  |
| Model 1                                                                                    |                         |                  |                  |                  |
| 1                                                                                          | 1.29 (1.20-1.39)        | 1.32 (1.21-1.43) | 1.40 (1.28-1.54) | 1.56 (1.41-1.72) |
| 2                                                                                          | 1.12 (1.04-1.21)        | 1.08 (0.99-1.18) | 1.23 (1.12-1.35) | 1.28 (1.15-1.41) |
| 3                                                                                          | 1.05 (0.97-1.14)        | 1.13 (1.03-1.23) | 1.09 (0.99-1.21) | 1.17 (1.05-1.29) |
| 4                                                                                          | 1.00 (reference)        | 1.09 (1.00-1.20) | 1.05 (0.95-1.16) | 1.18 (1.07-1.30) |

|         |                  |                  |                  |                  |
|---------|------------------|------------------|------------------|------------------|
| Model 2 |                  |                  |                  |                  |
| 1       | 1.22 (1.13-1.32) | 1.19 (1.09-1.31) | 1.28 (1.16-1.41) | 1.31 (1.18-1.45) |
| 2       | 1.09 (1.01-1.18) | 1.07 (0.98-1.18) | 1.17 (1.06-1.29) | 1.16 (1.05-1.28) |
| 3       | 1.07 (0.98-1.16) | 1.13 (1.03-1.23) | 1.08 (0.97-1.19) | 1.11 (1.00-1.23) |
| 4       | 1.00 (reference) | 1.06 (0.97-1.16) | 1.01 (0.91-1.12) | 1.10 (1.00-1.22) |
| Model 3 |                  |                  |                  |                  |
| 1       | 1.18 (1.09-1.28) | 1.15 (1.05-1.26) | 1.24 (1.12-1.36) | 1.30 (1.18-1.44) |
| 2       | 1.08 (0.99-1.17) | 1.05 (0.96-1.15) | 1.16 (1.06-1.28) | 1.16 (1.05-1.28) |
| 3       | 1.06 (0.98-1.15) | 1.12 (1.02-1.22) | 1.05 (0.95-1.16) | 1.12 (1.01-1.25) |
| 4       | 1.00 (reference) | 1.07 (0.98-1.18) | 1.02 (0.92-1.13) | 1.12 (1.01-1.24) |
| Model 4 |                  |                  |                  |                  |
| 1       | 1.19 (1.09-1.29) | 1.14 (1.04-1.26) | 1.21 (1.09-1.34) | 1.24 (1.10-1.40) |
| 2       | 1.09 (1.00-1.18) | 1.05 (0.95-1.15) | 1.14 (1.03-1.26) | 1.11 (0.99-1.25) |
| 3       | 1.07 (0.98-1.16) | 1.11 (1.01-1.21) | 1.04 (0.93-1.15) | 1.08 (0.96-1.21) |
| 4       | 1.00 (reference) | 1.06 (0.96-1.16) | 1.00 (0.90-1.11) | 1.07 (0.96-1.20) |

ORAC, oxygen radical absorbance capacity.

Covariates in model 1: age.

Covariates in model 2: age, body mass index, height, energy intake, alcohol intake, intake of yoghurt, cheese, red and processed meat, education, marital status (living alone vs. not), physical activity (metabolic equivalents), smoking habits (never/former/current smoker and for baseline 1997 also pack-years of smoking), ever use of antioxidant-containing supplements, and Charlson's weighted comorbidity index.

Covariates in model 3: as in model 2 and additionally use calcium-containing supplements and for baseline 1997 use of aspirin and prevalent hypercholesterolemia.

Covariates in model 4: as in model 3 and additionally energy adjusted dietary intake of protein, total and saturated fat, calcium, vitamin d, retinol, and phosphorous, ever use of cortisone, and ever use of estrogen replacement for women.

**Web Table 7.** Hazard ratios and 95% confidence intervals of all-cause mortality by categories of milk intake and fruit and vegetable intake or ORAC, BMI>35 excluded

|                                                               | Glasses of milk a day |                  |                  |                  |
|---------------------------------------------------------------|-----------------------|------------------|------------------|------------------|
|                                                               | <1                    | ≥1 to <2         | ≥2 to <3         | ≥3               |
| <i>Swedish Mammography Cohort (SMC; women), baseline 1997</i> |                       |                  |                  |                  |
| ORAC quartile                                                 |                       |                  |                  |                  |
| Model 2                                                       |                       |                  |                  |                  |
| 1                                                             | 1.22 (1.12-1.32)      | 1.30 (1.18-1.44) | 1.50 (1.29-1.75) | 1.60 (1.26-2.03) |
| 2                                                             | 1.06 (0.98-1.15)      | 1.10 (1.00-1.22) | 1.26 (1.08-1.47) | 1.29 (0.95-1.76) |
| 3                                                             | 1.08 (1.00-1.16)      | 1.03 (0.93-1.15) | 1.08 (0.91-1.28) | 1.02 (0.77-1.36) |
| 4                                                             | 1.00 (reference)      | 1.07 (0.97-1.18) | 1.13 (0.97-1.32) | 1.23 (0.95-1.59) |
| <i>Cohort of Swedish Men (COSM), baseline 1997</i>            |                       |                  |                  |                  |
| ORAC quartile                                                 |                       |                  |                  |                  |
| Model 2                                                       |                       |                  |                  |                  |
| 1                                                             | 1.21 (1.12-1.31)      | 1.20 (1.10-1.31) | 1.31 (1.19-1.43) | 1.30 (1.18-1.44) |
| 2                                                             | 1.08 (1.00-1.17)      | 1.07 (0.98-1.17) | 1.18 (1.07-1.29) | 1.17 (1.06-1.30) |
| 3                                                             | 1.06 (0.98-1.15)      | 1.12 (1.02-1.22) | 1.09 (0.99-1.21) | 1.11 (1.01-1.23) |
| 4                                                             | 1.00 (reference)      | 1.07 (0.98-1.17) | 1.01 (0.91-1.11) | 1.11 (1.00-1.22) |

ORAC, oxygen radical absorbance capacity.

Covariates in model: age, body mass index, height, energy intake, alcohol intake, intake of yoghurt, cheese, red and processed meat, education, marital status (living alone vs. not), physical activity (metabolic equivalents), smoking habits (never/former/current smoker and pack-years of smoking), ever use of antioxidant-containing supplements, and Charlson's weighted comorbidity index.

**Web Table 8.** Hazard ratios and 95% confidence intervals of all-cause mortality by categories of milk intake and fruit and vegetable intake or ORAC, current smokers excluded

|                                                               | Glasses of milk a day |                  |                  |                  |
|---------------------------------------------------------------|-----------------------|------------------|------------------|------------------|
|                                                               | <1                    | ≥1 to <2         | ≥2 to <3         | ≥3               |
| <i>Swedish Mammography Cohort (SMC; women), baseline 1997</i> |                       |                  |                  |                  |
| ORAC quartile                                                 |                       |                  |                  |                  |
| Model 2                                                       |                       |                  |                  |                  |
| 1                                                             | 1.22 (1.12-1.33)      | 1.27 (1.14-1.42) | 1.45 (1.21-1.74) | 1.41 (1.07-1.86) |
| 2                                                             | 1.06 (0.97-1.16)      | 1.08 (0.97-1.21) | 1.27 (1.06-1.51) | 1.18 (0.82-1.70) |
| 3                                                             | 1.07 (0.98-1.16)      | 1.02 (0.91-1.15) | 0.99 (0.81-1.20) | 1.17 (0.87-1.59) |
| 4                                                             | 1.00 (reference)      | 1.06 (0.95-1.19) | 1.08 (0.91-1.28) | 1.10 (0.82-1.47) |
| <i>Cohort of Swedish Men (COSM), baseline 1997</i>            |                       |                  |                  |                  |
| ORAC quartile                                                 |                       |                  |                  |                  |
| Model 2                                                       |                       |                  |                  |                  |
| 1                                                             | 1.12 (1.02-1.23)      | 1.13 (1.02-1.26) | 1.17 (1.05-1.31) | 1.28 (1.14-1.45) |
| 2                                                             | 1.04 (0.95-1.14)      | 1.02 (0.92-1.12) | 1.09 (0.98-1.22) | 1.05 (0.94-1.18) |
| 3                                                             | 1.03 (0.94-1.13)      | 1.08 (0.98-1.19) | 0.99 (0.88-1.11) | 1.05 (0.93-1.18) |
| 4                                                             | 1.00 (reference)      | 1.03 (0.93-1.14) | 0.98 (0.88-1.10) | 1.05 (0.93-1.17) |

ORAC, oxygen radical absorbance capacity.

Covariates in model: age, body mass index, height, energy intake, alcohol intake, intake of yoghurt, cheese, red and processed meat, education, marital status (living alone vs. not), physical activity (metabolic equivalents), smoking habits (never/former/current smoker and pack-years of smoking), ever use of antioxidant-containing supplements, and Charlson's weighted comorbidity index.
